# Supplementary material for: Interactions of Galloylated Polyphenols with a Simple Gram-Negative Bacterial Membrane Lipid Model
Source: MDPI journal article supplement (doi:10.3390/membranes14020047), 2024-02-08
Supplement: s1 [file s1]

## Supplementary Materials for Membranes

Interactions of galloylated polyphenols with a simple Gram-negative bacterial membrane lipid model

Ryan T. Coones <sup>1</sup>, Maarit Karonen <sup>2</sup>, Rebecca J. Green <sup>1,\*</sup> and Richard Frazier <sup>1</sup>

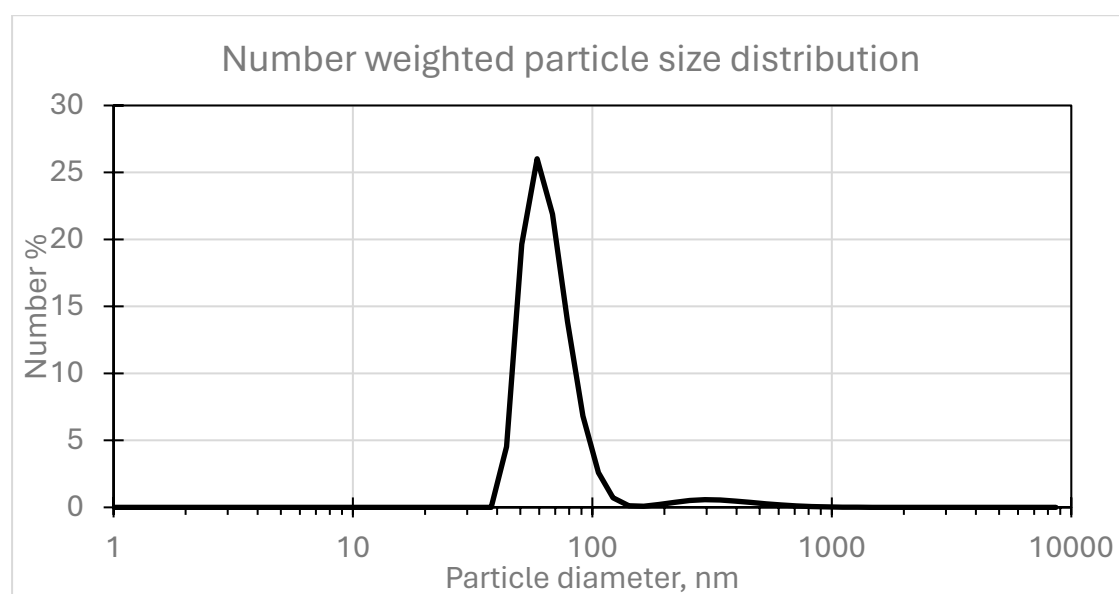

**Figure S1.** Typical number weighted particle size distribution for SUVs produced from 3:2 DPPE/DPPG lipid mixes.

**Table S1.** Thermodynamic parameters from reported DSC data

| Sample                                  | Peak 1                 |                          |                           | Peak 2                 |                          |                           |
|-----------------------------------------|------------------------|--------------------------|---------------------------|------------------------|--------------------------|---------------------------|
|                                         | $\Delta H$ ,<br>kJ/mol | $\Delta S$ ,<br>kJ/mol.K | Integration<br>limits, °C | $\Delta H$ ,<br>kJ/mol | $\Delta S$ ,<br>kJ/mol.K | Integration<br>limits, °C |
| DPPE/DPPG (3:2) non-ideal mixing        | 7.4342                 | 0.023                    | 46-57                     | 33.52                  | 0.10                     | 60 - 72                   |
| DPPE/DPPG (3:2) Ideal mixing            | -                      | -                        | -                         | 13.65                  | 0.04                     | 52 - 68                   |
| DPPE/DPPG (3:2) + EGCg (10:1) ideal mix | -                      | -                        | -                         | 33.67                  | 0.10                     | 52-68                     |
| DPPE/DPPG (3:2) + EGCg (5:1) ideal mix  | -                      | -                        | -                         | 14.69                  | 0.04                     | 56-70                     |
| DPPE/DPPG (3:2) + EGCg (2:1) ideal mix  | 10.5367                | 0.0326                   | 45-57                     | 43.07                  | 0.13                     | 58-72                     |
| DPPE/DPPG + egcg (10:1)                 | 8.2665                 | 0.0254                   | 47-59                     | 50.33                  | 0.15                     | 60-72                     |
| DPPE/DPPG + egcg (5:1)                  | -                      | -                        | -                         | 22.69                  | 0.07                     | 55-72                     |
| DPPE/DPPG + pgg (10:1)                  | 10.9875                | 0.0336                   | 50-63                     | 23.15                  | 0.07                     | 62-72                     |
| DPPE/DPPG + pgg (5:1)                   | 9.8094                 | 0.0299                   | 50-61                     | 30.12                  | 0.09                     | 63-70                     |
| DPPE/DPPG + pgg (2:1)                   |                        |                          |                           |                        |                          |                           |
| DPPE/DPPG + pgg (2:1)                   | 3.4398                 | 0.0106                   | 47-57                     | 42.21                  | 0.12                     | 58-73                     |
| DPPE/DPPG + Tel-II (10:1)               | 3.09                   | 0.0095                   | 49-57                     | 24.41                  | 0.07                     | 57-70                     |
| DPPE/DPPG + Tel-II (5:1)                | 2.6241                 | 0.008                    | 52-59                     | 30.79                  | 0.09                     | 60-72                     |
| DPPE/DPPG + Tel-II (2:1)                | 7.0131                 | 0.0214                   | 49-59                     | 21.32                  | 0.06                     | 62-70                     |
| DPPE/DPPG + Tel-I (10:1)                | 4.5921                 | 0.0141                   | 50-60                     | 28.78                  | 0.08                     | 60-71                     |
| DPPE/DPPG + Tel-I (5:1)                 | 5.7588                 | 0.0176                   | 49-59                     | 37.58                  | 0.11                     | 60-71                     |
| DPPE/DPPG + Tel-I (2:1)                 | 3.8901                 | 0.0119                   | 50-58                     | 12.40                  | 0.04                     | 58-69                     |
